# Supplementary material
Source: PubMed Central journal article supplement (PMC4123695)
Supplement: rspb20140370supp1.pdf [file rspb20140370supp1.pdf]

## 1 APPENDICES

2 Table S1. Latitudinal/longitudinal coordinates for stream mouths of the 14 study brook trout populations at Cape Race, Newfoundland  
 3 (see also Figure S1), as well as estimates of census population sizes ( $N$ ) per year of estimation, and effective number of breeders ( $N_b$ )  
 4 estimated per population, based on methodology described and reported by Wood et al. (2014). Sample sizes for  $N_b$  represent the  
 5 number of individuals screened at 13 polymorphic microsatellite loci per cohort. SNP  $n$  = the number of individuals screened in the  
 6 2011 cohort at 237 single nucleotide polymorphisms.

| Population            | Coordinates                  | 2010 $N$ (95% CI)             | 2011 $N$ (95% CI)          | $N_b$                    | C | $N_b$ sample size                 | SNP $n$ |
|-----------------------|------------------------------|-------------------------------|----------------------------|--------------------------|---|-----------------------------------|---------|
| Upper Whelan's        | 46°43'29.73"N, 53°13.53.34"W | NS                            | 3588 (3206-4107)           | 249 (114-∞) <sup>b</sup> | 1 | 74                                | 30      |
| Freshwater            | 46°38'45.91"N, 53°13'17.96"W | 4550 (4171-5028)              | 5385 (5076-5743)           | 101 (81-452)             | 3 | 45, 95, 114                       | 37      |
| Lower Coquita         | 46°38'45.12"N, 53°13'17.23"W | 316 (229-452) <sup>a</sup>    | 278 (173-483)              | 30 (26-36)               | 3 | 48, 59, 42                        | 31      |
| Upper Coquita         | 46°39'08.73"N, 53°12'45.88"W | 76 (50-99) <sup>a</sup>       | 79 (43-196)                | 15 (15-16)               | 2 | 19 <sup>c</sup> , 25 <sup>c</sup> | 22      |
| Hermitage Pond Brook  | 46°38'57.64"N, 53°12'43.11"W | 83 (65-111) <sup>d</sup>      | 73 (51-117) <sup>d</sup>   | 11 <sup>e</sup>          | 1 | 24                                | 21      |
| Bella's Brook         | 46°38'46.25"N, 53°12'39.09"W | NS                            | 510 (309-1169)             | 59 (39-105) <sup>b</sup> | 1 | 48                                | 28      |
| Bob's Cove            | 46°38'12.03"N, 53°12'58.78"W | 6132 (4500-9739) <sup>a</sup> | 4527 (4052-5167)           | 117 (69-423)             | 3 | 62, 95, 105                       | 37      |
| Still There By Chance | 46°38'07.41"N, 53°12'36.57"W | 1081 (696-1600)               | 1405 (1211-1696)           | 18 (7-72)                | 3 | 93, 42, 40                        | 32      |
| Whale Cove            | 46°38'02.44"N, 53°12'20.08"W | 1101 (857-1539) <sup>a</sup>  | 735 (626-936)              | 44 (35-87)               | 3 | 66, 48, 108                       | 36      |
| Ditchy                | 46°38'56.85"N, 53°11'30.03"W | 107 (76-161)                  | 179 (132-265) <sup>a</sup> | 29 (26-34)               | 2 | 26 <sup>f</sup> , 35 <sup>f</sup> | 28      |
| Upper Ouananiche Beck | 46°38'56.38"N, 53°11'10.54"W | 2233 (1651-3247)              | 3835 (3355-6269)           | 135 (93-231)             | 3 | 67, 36, 93                        | 38      |
| Watn Cove             | 46°37'58.05"N, 53°09'32.61"W | 6223 (5049-8434)              | 8416 (7225-10255)          | 130 (119-137)            | 3 | 59, 96, 133                       | 38      |
| Blackfly              | 46°38'04.72"N, 53°09'32.02"W | 966 (806-1237)                | 1731 (1148-2238)           | 45 (30-64)               | 3 | 46, 54, 52                        | 33      |
| Cripple Cove          | 46°38'45.73"N, 53°06'09.27"W | 1683 (992-2927)               | 2412 (2231-2632)           | 46 (28-101)              | 3 | 80, 76, 71                        | 35      |

7 *Notes:*  $N_b$  reported is the weighted harmonic mean of point estimates across cohorts within a population following methodology in  
8 Waples and Do (2008). The range of point estimates are in parentheses. NS = not sampled. Point estimates of  $N_b$  and corresponding  
9 95% CI) for individual cohorts within each population can be found in Appendix B1 of Wood et al. (2014).  
10 C = number of cohorts sampled. Unless otherwise stated; cohort sample sizes screened at 13 microsatellite loci are listed in this order  
11 (3 = 2009, 2010, 2011; 2 = 2010, 2011; 1 = 2011).  
12 <sup>a</sup>Schnabel method used for  $N$  estimation.  
13 <sup>b</sup>(95%CI reported if only one cohort sampled).  
14 <sup>c</sup>2009 and 2010 cohorts, respectively  
15 <sup>d</sup>2012 and 2013 estimates (discovered in 2012)  
16 <sup>e</sup>Estimated due to very low levels of polymorphism across different marker loci, based on the relationship between  $N_b$  and  $N$  across all  
17 Cape Race populations (see main text for more detail).  
18 <sup>f</sup>2010 and 2011 cohorts, respectively.  
19

20 Table S2. Model results for the relationship between pairwise estimated neutral  $F_{ST}$  and population size, represented by either the  
 21 effective number of breeders ( $N_b$ ) or adult census population size ( $N$ ). Neutral pairwise  $F_{ST}$  estimates were corrected for effects of  
 22 pairwise geographic distance and adjusted to a common distance. For each of the two models, the fixed continuous covariates of  
 23 population size for population one (pop1), population two (pop2), the interaction of both population sizes were tested for significance  
 24 by a backwards selection procedure.

| <b>Model</b> | <b>Fixed terms</b>      | <b>Term</b>           | <b>DF / DDF</b> | <b>F</b> | <b>P</b> |
|--------------|-------------------------|-----------------------|-----------------|----------|----------|
| 1 N          | N_pop1 * N_pop2         | N_pop1                | 1 / 12          | 1.8      | 0.205    |
|              |                         | N_pop2                | 1 / 12          | 1.8      | 0.204    |
|              |                         | N_pop1:N_pop2         | 1 / 154.6       | 2.7      | 0.104    |
| 2 N          | N_pop1 + N_pop2         | N_pop1                | 1 / 12          | 1.8      | 0.207    |
|              |                         | N_pop2                | 1 / 12          | 1.8      | 0.206    |
| 1 $N_b$      | $N_b\_pop1 * N_b\_pop2$ | $N_b\_pop1$           | 1 / 12          | 2.9      | 0.114    |
|              |                         | $N_b\_pop2$           | 1 / 12          | 3.0      | 0.109    |
|              |                         | $N_b\_pop1:N_b\_pop2$ | 1 / 154.4       | 0.9      | 0.344    |
| 2 $N_b$      | $N_b\_pop1 + N_b\_pop2$ | $N_b\_pop1$           | 1 / 12          | 3.0      | 0.111    |
|              |                         | $N_b\_pop2$           | 1 / 12          | 3.0      | 0.110    |

25

26 Figure S1. Map of the general location of the study area and specific locations of each study population at Cape Race, Newfoundland.  
27 Population codes: (1) Upper Whelan's; (2) Freshwater; (3) Lower Coquita; (4) Upper Coquita; (5) Hermitage Pond Brook; (6) Bella's  
28 Brook; (7) Bob's Cove; (8) Still There By Chance; (9) Whale Cove; (10) Ditchy; (11) Upper Ouananiche Beck; (12) Watern Cove;  
29 (13) Blackfly; (14) Cripple Cove. Note that only Cape Race stream drainages within brook trout populations included in the present  
30 study are included in the map.

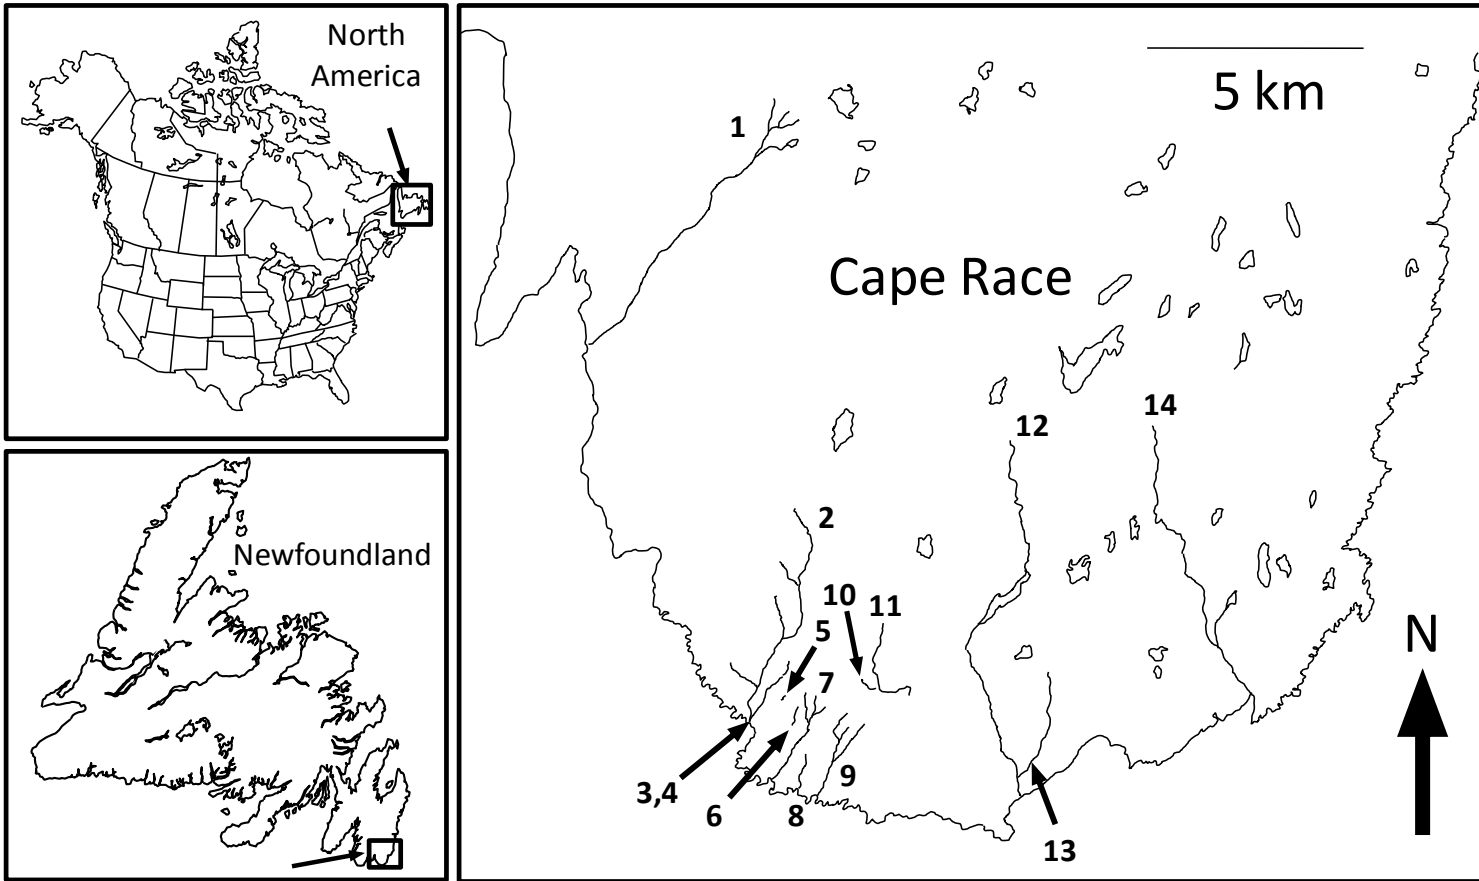

31

32

33 Figure S2. Pairwise  $F_{ST}$  as a function of both population size measures for population pairs, represented by either the effective number  
34 of breeders (a) or adult census population size (b). Neutral pairwise  $F_{ST}$  estimates were corrected for effects of pairwise geographic  
35 distance and adjusted to a common distance. The shading of the bar corresponds to  $F_{ST}$  values of the plotted area.

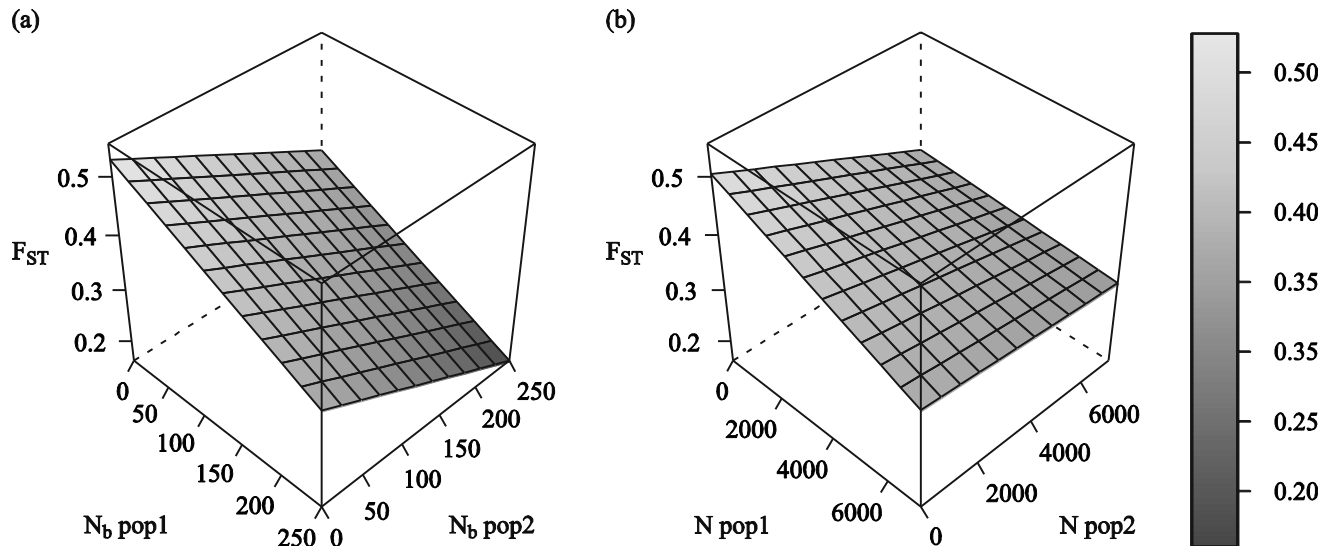

37 Figure S3. The association between either the effective number of breeders ( $N_b$ ) or adult census population size ( $N$ ) and the ratio of  
38  $N_b/N$  among 14 brook trout populations. Note that these are not ‘true’  $N_b/N$  ratios (population size measures do not correspond to  
39 identical time periods, see Palstra and Fraser 2012): they are shown here to demonstrate that a population’s rank in our analyses was  
40 not necessarily the same for  $N_b$  and  $N$  because of variation in  $N_b/N$  ratios.

41

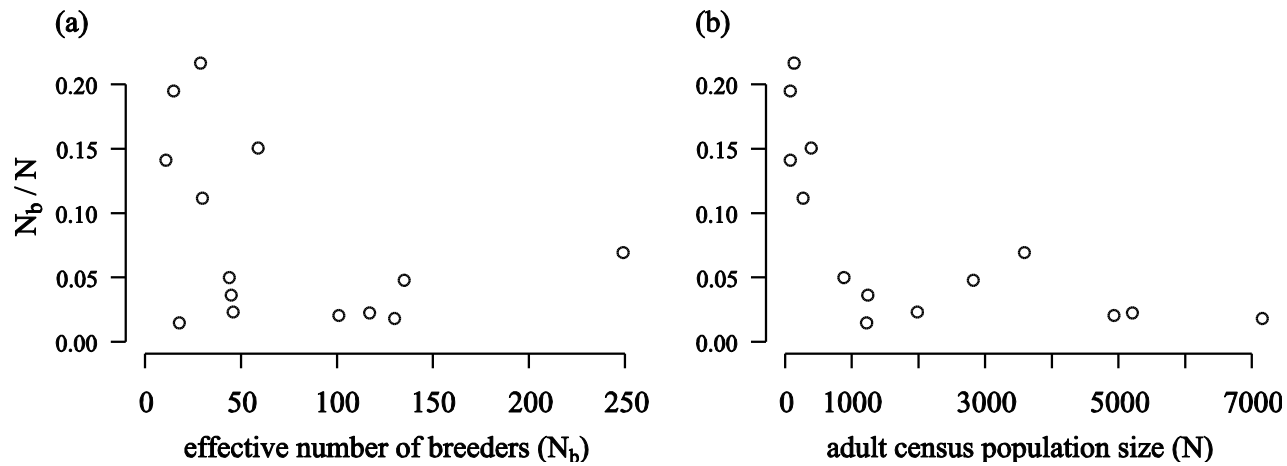42  
43
